# Supplementary material for: Insights into the Regulation of DMSP Synthesis in the Diatom Thalassiosira pseudonana through APR Activity, Proteomics and Gene Expression Analyses on Cells Acclimating to Changes in Salinity, Light and Nitrogen
Source: PubMed Central journal article supplement (PMC3986220; doi:10.1371/journal.pone.0094795), 2014-04-14
Supplement: pone.0094795.s003.pdf [file pone.0094795.s003.pdf]

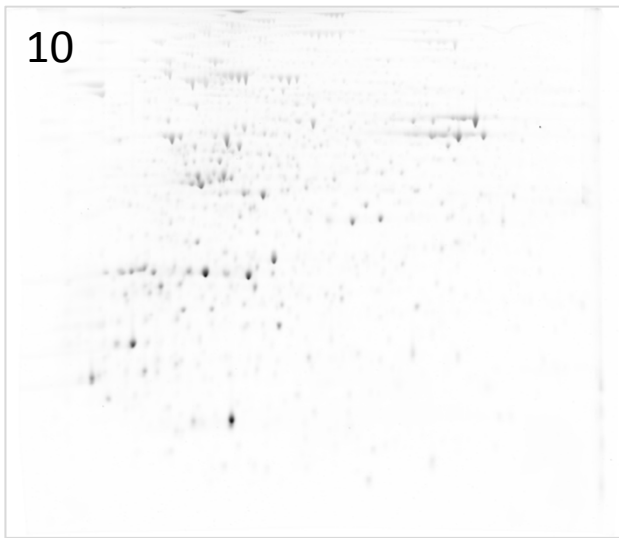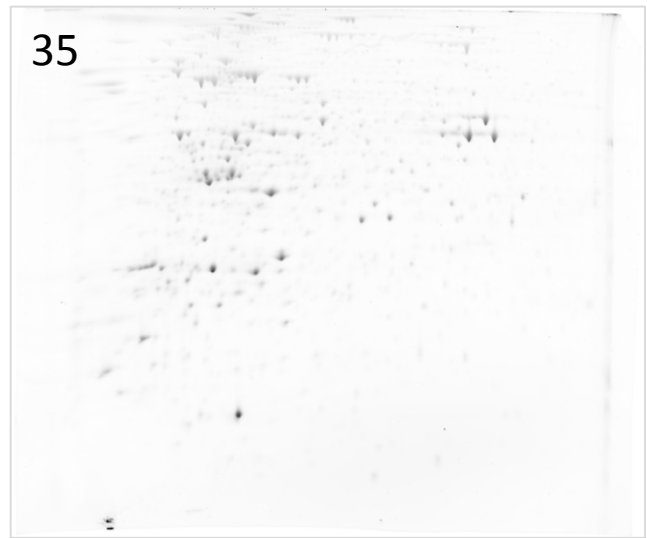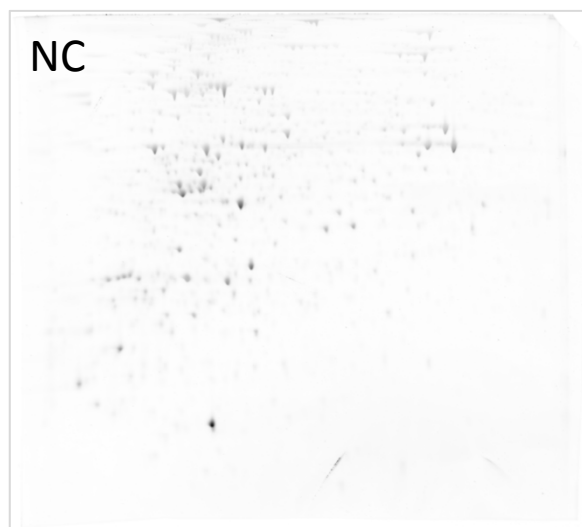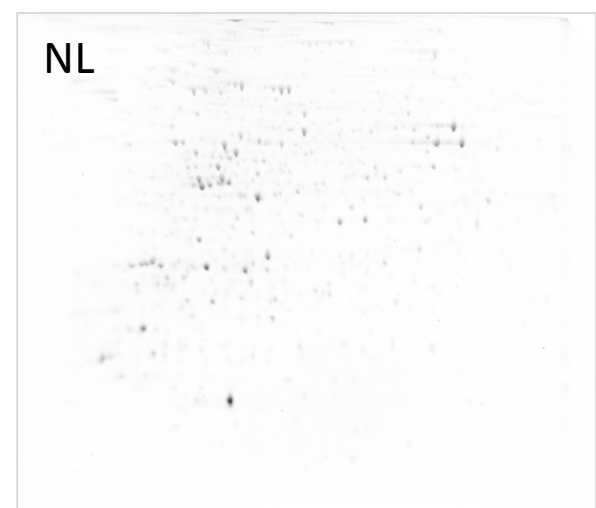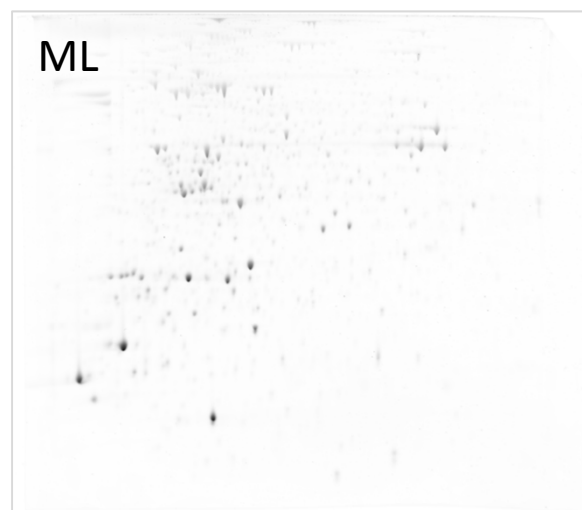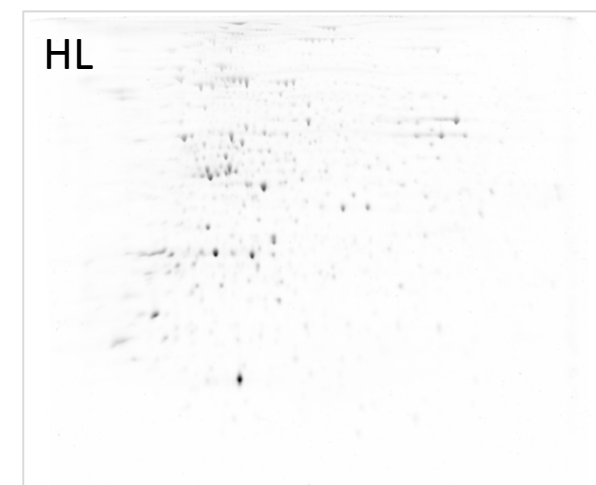

**Supplementary Figure S3.** Examples of 2 dimensional gels used in the comparison of the proteome of *T. pseudonana* grown under low and normal salinity (10, 35), nitrogen replete and nitrogen limiting (NC, NL) and moderate and high light (ML, HL) conditions.
