# Supplementary material for: Insights into the Regulation of DMSP Synthesis in the Diatom Thalassiosira pseudonana through APR Activity, Proteomics and Gene Expression Analyses on Cells Acclimating to Changes in Salinity, Light and Nitrogen
Source: PubMed Central journal article supplement (PMC3986220; doi:10.1371/journal.pone.0094795), 2014-04-14
Supplement: pone.0094795.s004.pdf [file pone.0094795.s004.pdf]

**Supplementary Table S1.** Primers used in qRT-PCR studies. Length (L), melting temperature (MT), % GC content (GC), product size (PS), efficiency (E).

|                            | Gene   | Gene ID | Sequence                  | L  | MT    | GC    | PS  | E    |
|----------------------------|--------|---------|---------------------------|----|-------|-------|-----|------|
| Beta Tubulin               | TUB3   | 31569   | L:AAGGAGGTGGATGATGAGATG   | 21 | 58.95 | 47.62 | 152 | 2.03 |
|                            |        |         | R:ATGCAGGTGGAGTTACCAATG   | 21 | 59.87 | 47.62 |     |      |
| Sulphate Transporter 1     | Trans1 | 261147  | L:CATTGTCGGTATCGCATCTG    | 20 | 60.10 | 50.00 | 137 | 2.02 |
|                            |        |         | R:TCGACATTGAACCACTCACTG   | 21 | 59.74 | 47.62 |     |      |
| Sulphate Transporter 2     | Trans2 | 263781  | L:TGTTCCACCATCTTGTGACGAC  | 22 | 61.00 | 45.45 | 121 | 1.97 |
|                            |        |         | R:GCACTGATTGTGGTGGACTG    | 20 | 60.16 | 55.00 |     |      |
| ATP Sulphurylase 1         | ATPS1  | 269714  | L:AATGGAAGTTCAAAAGGCACTC  | 22 | 59.64 | 40.91 | 100 | 1.98 |
|                            |        |         | R:GTTGAAGAAGGGTGTCCGTAG   | 22 | 60.03 | 50.00 |     |      |
| ATP Sulphurylase 2         | ATPS2  | 1326    | L:GATGATGTTGACGTGGTTGC    | 20 | 59.97 | 50.00 | 129 | 2.04 |
|                            |        |         | R:GTAGGATGGACGAGGACAACCTC | 22 | 60.00 | 54.55 |     |      |
| APS Reductase 1*           | APR1   | 35690   | L:AGTTGGCACGTGAAAATGTG    | 20 | 59.62 | 45.00 | 127 | 1.99 |
|                            |        |         | R:GGCTGTACGACAAGTAAGCAAG  | 22 | 59.11 | 50.00 |     |      |
| APS Reductase 2            | APR2   | 24887   | L:GAGAGTGCTGGAGTTCCTGTG   | 21 | 60.04 | 57.14 | 102 | 2.01 |
|                            |        |         | R:GATGAAGTTGACAGTAGGGAAGC | 23 | 59.30 | 47.83 |     |      |
| OAS Thiollyase 1*          | OASTL1 | 22293   | L:CAATACTTGAAACCTCGCAATC  | 22 | 58.77 | 40.91 | 156 | 1.92 |
|                            |        |         | R:CGTCGATTAGAGAAGTGTCTGC  | 22 | 59.15 | 50.00 |     |      |
| OAS Thiollyase 2           | OASTL2 | 31829   | L:TGCTTCCTGACACTGGTGAG    | 20 | 60.02 | 55.00 | 109 | 1.92 |
|                            |        |         | R:ATCCAACCTGGGAGTGCTACG   | 20 | 60.13 | 55.00 |     |      |
| OAS Thiollyase 3           | OASTL3 | 267987  | L:GGATTGTTTCGTCGGATCAAG   | 20 | 60.46 | 50.00 | 109 | 1.87 |
|                            |        |         | R:GCCCTCCATCACATAACAACAG  | 21 | 60.39 | 52.38 |     |      |
| Serine Acetyltransferase 1 | SAT1   | 38294   | L:AGTTCTCGCGCATTACCTACAG  | 22 | 60.81 | 50.00 | 121 | 1.91 |
|                            |        |         | R:CTCTCCAATAACGATCCCTGTG  | 22 | 60.87 | 50.00 |     |      |
| Serine Acetyltransferase 1 | SAT2   | 37497   | L:CTCTCGGAGGTACGGGTAAAG   | 21 | 60.13 | 57.14 | 104 | 2.01 |
|                            |        |         | R:GCCAACAAAGATATTTCCCAAG  | 22 | 59.84 | 40.91 |     |      |
| Serine Acetyltransferase 3 | SAT3   | 16842   | L:GAATGGCAATGTATGTGCAAAG  | 22 | 60.38 | 40.91 | 120 | 2.05 |
|                            |        |         | R:TTTACCAATCACCCTCCTC     | 21 | 59.96 | 47.62 |     |      |
| Sulphite Reductase         | SiR    | 31984   | L:CCGTGTACTCCTCAACAAGATG  | 22 | 59.66 | 50.00 | 101 | 1.96 |
|                            |        |         | R:CCAATTCTGCCATGTAAGGAC   | 21 | 59.44 | 47.62 |     |      |

\*Indicates that the region of amplification includes an intron.
